# Supplementary material for: “Begging the Question”—Does Toxocara Infection/Exposure Associate with Multiple Sclerosis-Risk?
Source: PubMed Central journal article supplement (PMC7696196; doi:10.3390/pathogens9110938), 2020-11-11
Supplement: pathogens-09-00938-s001.pdf [file pathogens-09-00938-s001.pdf]

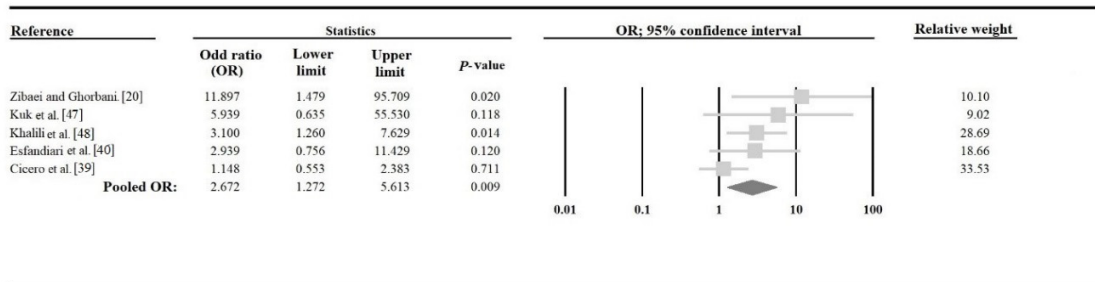

**Figure S1.** Forest plot for sensitivity analysis (after removing of study by Khalilidehkordi et al. [49], which was a conference paper) pooled with random effects regarding the association between *Toxocara* infection/exposure (assessed by anti-*Toxocara* serum IgG antibody detection) and multiple sclerosis (MS), showing the odd ratio (OR) and a 95% confidence interval (CI). The *P*-value referred to the significance of OR.

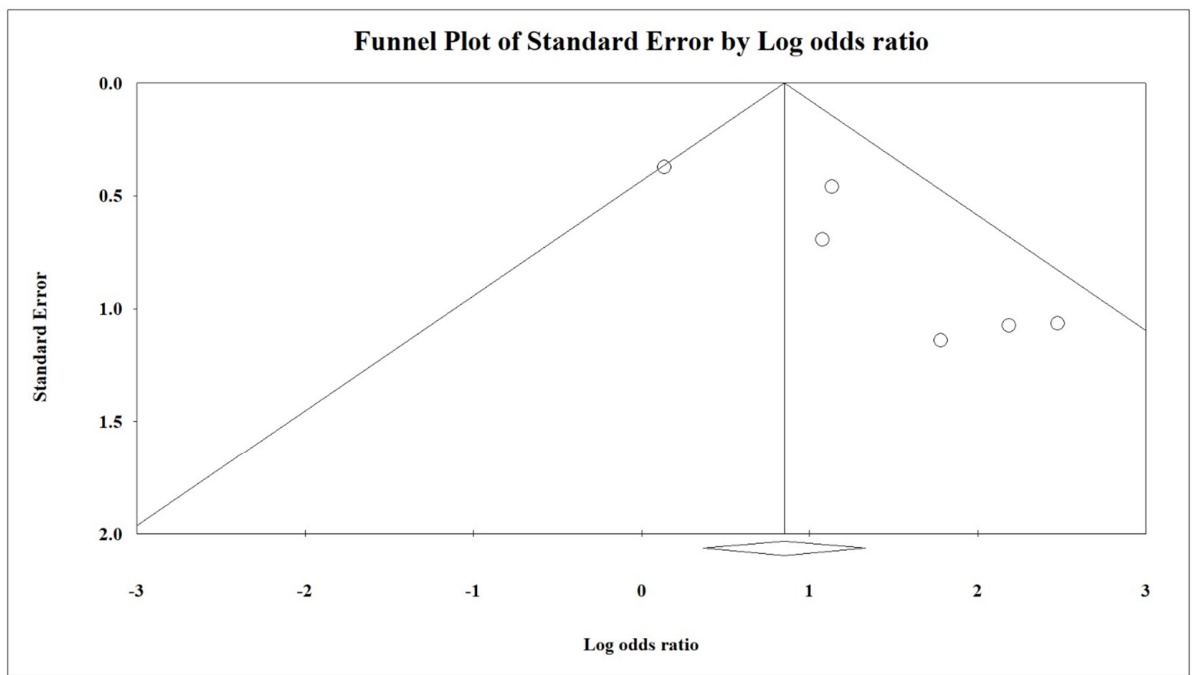

**Figure S2.** Publication bias calculated using an Egger's plot.
